# Supplementary material for: The roles of MASPIN expression and subcellular localization in non-small cell lung cancer
Source: PubMed Central journal article supplement (PMC7251327; doi:10.1042/bsr20200743), 2020-05-26
Supplement: BSR-2020-0743_supp.pdf [file BSR-2020-0743_supp.pdf]

**Supplementary Table S1.** Search strategies in Medline.

---

- #1 "Carcinoma, Non-Small-Cell Lung" [Mesh]

---

  - #2 Carcinoma, Non Small Cell Lung [All fields] OR Lung Carcinomas, Non-Small-Cell [All fields] OR Non Small Cell Lung Carcinoma [All fields] OR Non-Small Cell Lung Cancer [All fields]
  - #3 #1 OR #2
  - #4 "SERPIN-B5" [Supplementary Concept]
  - #5 Maspin [All fields] OR SERPINB5 [All fields] OR Protease inhibitor 5 [All fields]
  - #6 #4 OR #5
  - #7 "Prognosis" [Mesh]
  - #8 Prognoses [All fields] OR Prognostic Factors [All fields] OR Factor, Prognostic [All fields]
  - #9 #7 OR #8
  - #10 #3 AND #6 AND #9
-

**Supplementary Table S2.** Meta-analysis of the association between cytoplasmic or total (cytoplasmic + nuclear) MASPIN expression and clinicopathological characteristics.

| Location | Clinicopathological parameter       | Studies (n) | OR (95% CI)      | P-value | I <sup>2</sup> (%) | Model  |
|----------|-------------------------------------|-------------|------------------|---------|--------------------|--------|
| T(C+N)   | Gender (male versus female)         | 9           | 1.71(1.31-2.23)  | <0.001  | 39.40%             | Fixed  |
| T(C+N)   | Age (old versus young)              | 7           | 1.41(1.04-1.91)  | 0.027   | 37.00%             | Fixed  |
| T(C+N)   | Type (LUAD versus LUSC)             | 7           | 0.25(0.13-0.47)  | <0.001  | 81.30%             | Random |
| T(C+N)   | T stage (T2-4 versus T1)            | 5           | 1.82(1.08-3.07)  | 0.024   | 59.60%             | Random |
| T(C+N)   | Clinical stage (III-IV versus I-II) | 7           | 1.81(0.94-3.50)  | 0.078   | 73.90%             | Random |
| T(C+N)   | LN (yes versus no)                  | 8           | 1.15(0.68-1.96)  | 0.604   | 76.00%             | Random |
| T(C+N)   | Differentiation (poor versus well)  | 5           | 0.93(0.62-1.41)  | 0.74    | 21.40%             | Fixed  |
| T(C+N)   | Pleural invasion (yes versus no)    | 3           | 1.71(1.08-2.72)  | 0.023   | 27.40%             | Fixed  |
| C        | Gender (male versus female)         | 6           | 1.68(1.18-2.39)  | 0.004   | 13.40%             | Fixed  |
| C        | Age (old versus young)              | 4           | 1.7(1.07-2.71)   | 0.026   | 0.00%              | Fixed  |
| C        | Type (LUAD versus LUSC)             | 4           | 0.20(0.05-0.84)  | 0.028   | 82.60%             | Random |
| C        | T stage (T2-4 versus T1)            | 4           | 1.36(0.92-2.02)  | 0.127   | 46.80%             | Fixed  |
| C        | TNM (III/IV versus I/II)            | 4           | 2.98(1.03-8.64)  | 0.045   | 88.40%             | Random |
| C        | LN (yes versus no)                  | 6           | 1.64(0.96-2.81)  | 0.068   | 57.50%             | Random |
| C        | Differentiation (poor versus well)  | 2           | 1.61(0.21-12.33) | 0.65    | 90.50%             | Random |
| C        | Pleural invasion (yes versus no)    | 3           | 2.07(1.18-3.64)  | 0.012   | 0.00%              | Fixed  |

Abbreviation: LUAD: lung adenocarcinoma; LUSC: lung squamous cell carcinoma; NSCLC: non-small lung cancer; LN: lymph node; OS: overall survival; PFS: progression-free survival; DFS: disease-free survival; DSS: disease-specific survival; OR: odds ratio; HR: hazard ratio; C: cytoplasm; N: nucleus; T: total, T = C+N; CI: confidence interval.

**Supplementary Table S3.** GO functional annotation of the most significant related targets of MASPIN.

| GO ID                     | GO term                                         | Count (%) | Gene symbol                                                                                                                                           | <i>P</i> |
|---------------------------|-------------------------------------------------|-----------|-------------------------------------------------------------------------------------------------------------------------------------------------------|----------|
| <b>Biological process</b> |                                                 |           |                                                                                                                                                       |          |
| GO:0045104                | Intermediate filament cytoskeleton organization | 3         | KRT6C, KRT6A, KRT16                                                                                                                                   | 2.04E-03 |
| GO:0008544                | Epidermis development                           | 4         | KRT17, KRT16, GJB5, LAMC2                                                                                                                             | 6.75E-03 |
| GO:0030336                | Negative regulation of cell migration           | 4         | KRT16, PKP2, NKX2-1, SRGAP1                                                                                                                           | 9.15E-03 |
| GO:0007154                | Cell communication                              | 3         | GJB3, GJB4, GJB5                                                                                                                                      | 1.28E-02 |
| GO:0006486                | Protein glycosylation                           | 4         | ST3GAL5, B3GNT5, B3GALT5, GALNT11                                                                                                                     | 1.46E-02 |
| GO:0010951                | Negative regulation of endopeptidase activity   | 4         | PI3, SERPINB7, SERPINB4, SERPINB3                                                                                                                     | 1.75E-02 |
| GO:0042753                | Positive regulation of circadian rhythm         | 2         | NKX2-1, ARNTL2                                                                                                                                        | 3.56E-02 |
| GO:0043129                | Surfactant homeostasis                          | 2         | ADGRF5, NAPSA                                                                                                                                         | 3.56E-02 |
| GO:0097186                | Amelogenesis                                    | 2         | ITGA6, PERP                                                                                                                                           | 4.00E-02 |
| GO:0043086                | Negative regulation of catalytic activity       | 3         | SERPINB3, ANXA2, ANXA2P2                                                                                                                              | 4.54E-02 |
| <b>Cellular component</b> |                                                 |           |                                                                                                                                                       |          |
| GO:0005882                | Intermediate filament                           | 5         | KRT6C, KRT6A, KRT17, KRT16, PKP2                                                                                                                      | 1.47E-03 |
| GO:000592                 | Connexon complex                                | 3         | GJB3, GJB4, GJB5                                                                                                                                      | 3.69E-03 |
| GO:0070062                | Extracellular exosome                           | 20        | KRT6C, GDA, KRT6A, RAB3B, KRT6B, STXBP1, C16ORF89, BCAM, NAPSA, SDCBP2, ANXA2, ANXA2P2, GPD1L, KRT17, KRT16, AKR1B10, SLC2A1, PI3, SERPINB4, SERPINB3 | 2.94E-02 |
| GO:0005604                | Basement membrane                               | 3         | ITGA6, ANXA2, ANXA2P2                                                                                                                                 | 4.61E-02 |
| <b>Molecular function</b> |                                                 |           |                                                                                                                                                       |          |
| GO:0005200                | Structural constituent of cytoskeleton          | 5         | KRT6A, KRT6B, KRT17, KRT16, HIP1                                                                                                                      | 1.12E-03 |
| GO:0004867                | Serine-type endopeptidase inhibitor activity    | 4         | PI3, SERPINB7, SERPINB4, SERPINB3                                                                                                                     | 7.62E-03 |
| GO:0005546                | Phosphatidylinositol-4,5-bisphosphate binding   | 3         | ANXA8, ANXA2, HIP1                                                                                                                                    | 2.41E-02 |

|            |                                        |   |                       |          |
|------------|----------------------------------------|---|-----------------------|----------|
| GO:0005544 | Calcium-dependent phospholipid binding | 3 | ANXA8, ANXA2, ANXA2P2 | 2.41E-02 |
| GO:0019966 | Interleukin-1 binding                  | 2 | IL1R2, TRIM16         | 2.46E-02 |
| GO:0004859 | Phospholipase inhibitor activity       | 2 | ANXA2, ANXA2P2        | 4.47E-02 |

---

**Supplementary Table S4.** KEGG pathway enrichment analysis of MASPIN target genes

| KEGG ID  | KEGG term              | Count (%) | Gene symbol                                                                               | <i>P</i> |
|----------|------------------------|-----------|-------------------------------------------------------------------------------------------|----------|
| hsa05146 | Amoebiasis             | 4         | IL1R2, SERPINB4, LAMC2, SERPINB3                                                          | 9.71E-03 |
| hsa01100 | Metabolic pathways     | 11        | GDA, ST3GAL5, B3GNT5, B3GALT5,<br>AKR1B10, PLCD3, CYP4F3, UCK2,<br>COX6B2, ACAD8, GALNT11 | 2.28E-02 |
| hsa05222 | Small cell lung cancer | 3         | ITGA6, CDK6, LAMC2                                                                        | 4.94E-02 |
